# Supplementary material for: Essential Factors for Incompatible DNA End Joining at Chromosomal DNA Double Strand Breaks In Vivo
Source: PubMed Central journal article supplement (PMC3237495; doi:10.1371/journal.pone.0028756), 2011-12-14
Supplement: pone.0028756.s002.pdf [file pone.0028756.s002.pdf]

Table S1. Knockdown efficiency.

| Target of RNA interference | Target protein fraction* |
|----------------------------|--------------------------|
| CTR                        | 1.00                     |
| KU80                       | 0.08                     |
| Artemis                    | 0.15                     |
| LIG4                       | 0.26                     |
| POL $\lambda$              | 0.24                     |
| POL $\mu$                  | 0.13                     |
| POL $\lambda$ &POL $\mu$   | 0.27/0.28                |
| RAD52                      | 0.16                     |

\*

Fraction of protein levels from targeting siRNA-transfected cells versus those from non-targeting siRNA-transfected cells.
