# Supplementary material for: Essential Factors for Incompatible DNA End Joining at Chromosomal DNA Double Strand Breaks In Vivo
Source: PubMed Central journal article supplement (PMC3237495; doi:10.1371/journal.pone.0028756), 2011-12-14
Supplement: pone.0028756.s003.pdf [file pone.0028756.s003.pdf]

Table S2. Joined products resulting from the impairment of NHEJ proteins

|                          | Product |         |          |     |       | P value by exact test<br>against CTR/DMSO |
|--------------------------|---------|---------|----------|-----|-------|-------------------------------------------|
|                          | Type I  | Type II | Type III | Del | Other |                                           |
| DMSO                     | 26      | 2       | 1        | 1   | 0     | -                                         |
| NU7026                   | 7       | 11      | 5        | 2   | 2     | 1.9E-05                                   |
| CTR                      | 68      | 11      | 3        | 3   | 5     | -                                         |
| KU80                     | 15      | 27      | 14       | 5   | 4     | 2.4E-10                                   |
| Artemis                  | 17      | 2       | 0        | 0   | 2     | 0.74                                      |
| LIG4                     | 14      | 6       | 1        | 0   | 1     | 0.41                                      |
| POL $\lambda$            | 41      | 3       | 2        | 1   | 2     | 0.82                                      |
| POL $\mu$                | 35      | 8       | 0        | 1   | 4     | 0.71                                      |
| POL $\lambda$ &POL $\mu$ | 16      | 10      | 13       | 4   | 3     | 5.2E-06                                   |
